# Supplementary material
Source: ML conference proceedings conference paper supplement (https://openaccess.thecvf.com/content/ICCV2025/html/Hanna_Know_Your_Attention_ICCV_2025_paper.html)
Supplement: Supplementary file 1 [file Hanna_Know_Your_Attention_ICCV_2025_supplemental.pdf]

# Know Your Attention Maps: Class-specific Token Masking for Weakly Supervised Semantic Segmentation

## Supplementary Material

### 8. Implementation details

Our method, as outlined in the Approach Section (Section 3), is implemented using the PyTorch framework [20]. During training, we use the AdamW optimizer [17] with parameters  $\beta_1 = 0.9$  and  $\beta_2 = 0.95$ . A cosine learning rate schedule with a linear warmup was applied. Each experiment was trained for 200 epochs.

For the Transformer’s hyperparameters, we use patch sizes of  $16 \times 16$  for the MS-COCO, PascalVOC, ADE20K and EndoTect datasets, and  $14 \times 14$  for the DFC2020 dataset. The model was configured with a depth of 12 blocks and 16 heads. The  $\lambda$  value controlling the pruning was set to 0.01 (Equation 1), and we used a masking ratio of 50% for the [CLS] tokens.

Table 7. Model parameters for the specialized dataset

|                   | DFC2020          | EndoTect         | ADE20K           |
|-------------------|------------------|------------------|------------------|
| Image size        | $224 \times 224$ | $512 \times 640$ | $200 \times 320$ |
| Nb. of channels   | 15               | 3                | 3                |
| Nb. of classes    | 8                | 23               | 151              |
| Patch size        | $14 \times 14$   | $16 \times 16$   | $16 \times 16$   |
| Depth             | 12               | 12               | 12               |
| Nb. of heads      | 16               | 16               | 16               |
| Nb. of parameters | 87.7M            | 86.6M            | 122M             |

Table 8. Effects of  $\lambda$  (Equation 1) on sparsity rate (percentage of pruned heads) and multi-label accuracy.

|          |                 | $\lambda = 0$ | $\lambda = 0.001$ | $\lambda = 0.01$ | $\lambda = 0.1$ |
|----------|-----------------|---------------|-------------------|------------------|-----------------|
| DFC2020  | Sparsity rate   | 0             | 46                | 69               | 78              |
|          | Classifier Acc. | 86.2          | 86.2              | 86.1             | 84.2            |
|          | Pixel Acc.      | 70.0          | 71.1              | 74.1             | 72.9            |
|          | mIoU            | 59.8          | 64.3              | 67.2             | 65.5            |
| EndoTect | Sparsity rate   | 0             | 64                | 79               | 88              |
|          | Classifier Acc. | 84.5          | 84.1              | 84.0             | 81.8            |
|          | Pixel Acc.      | 79.3          | 79.2              | 78.4             | 76.0            |
|          | mIoU            | 69.9          | 69.8              | 69.8             | 68.6            |
| ADE20K   | Sparsity rate   | 0             | 55                | 60               | 77              |
|          | Classifier Acc. | 93.5          | 93.9              | 94.1             | 93.0            |
|          | Pixel Acc.      | 47.7          | 49.9              | 51.8             | 48.2            |
|          | mIoU            | 37.3          | 37.4              | 38.2             | 37.8            |

### 9. Sensitivity Analysis

In this section, we conduct a sensitivity analysis to examine the impact of enforcing sparsity during training, on the

performance of our Vision Transformer model as a multi-label classifier and on the accuracy of the generated pseudomasks. We vary the  $\lambda$  parameter in the objective function (shown in Equation 1). We experiment with the following values:  $\lambda = 0$  (no pruning),  $\lambda = 0.001$ ,  $\lambda = 0.01$ , and  $\lambda = 0.1$ . Results are reported in Table 8. The resulting models have different numbers of heads retained. The larger  $\lambda$ , the sparser the network becomes.

### 10. Qualitative Results on the Specialized Datasets

A qualitative comparison against various baselines in Figure 7 for the ADE20K, Figure 8 for the DFC2020 and Figure 9 for the EndoTect medical imaging dataset highlight that our method is the closest to the groundtruth. Across all datasets, our approach results in pseudomasks with more accurate shapes and better class assignments compared to other WSSS methods.

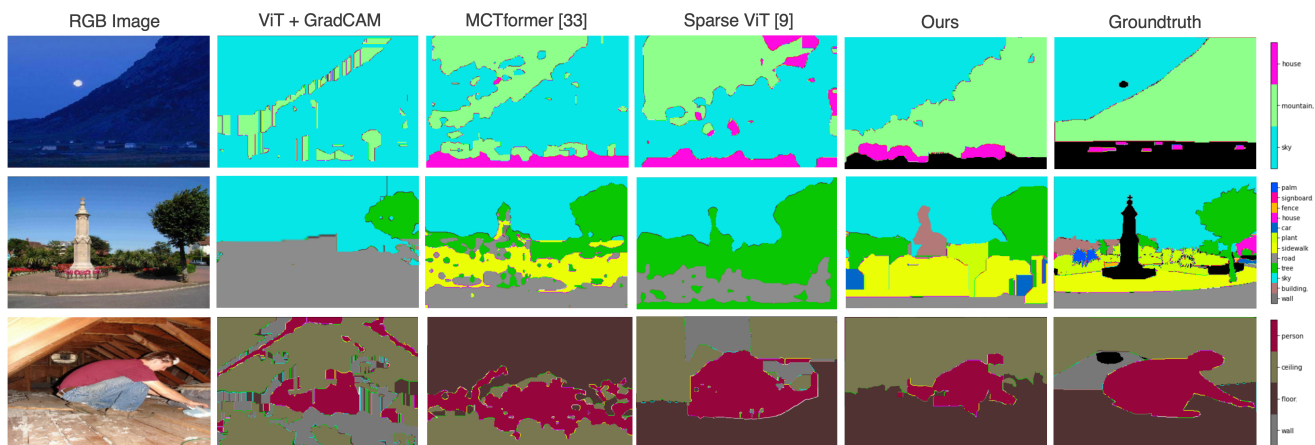

Figure 7. Qualitative comparison of our approach with other weakly supervised methods and the groundtruth, for the ADE20K dataset.

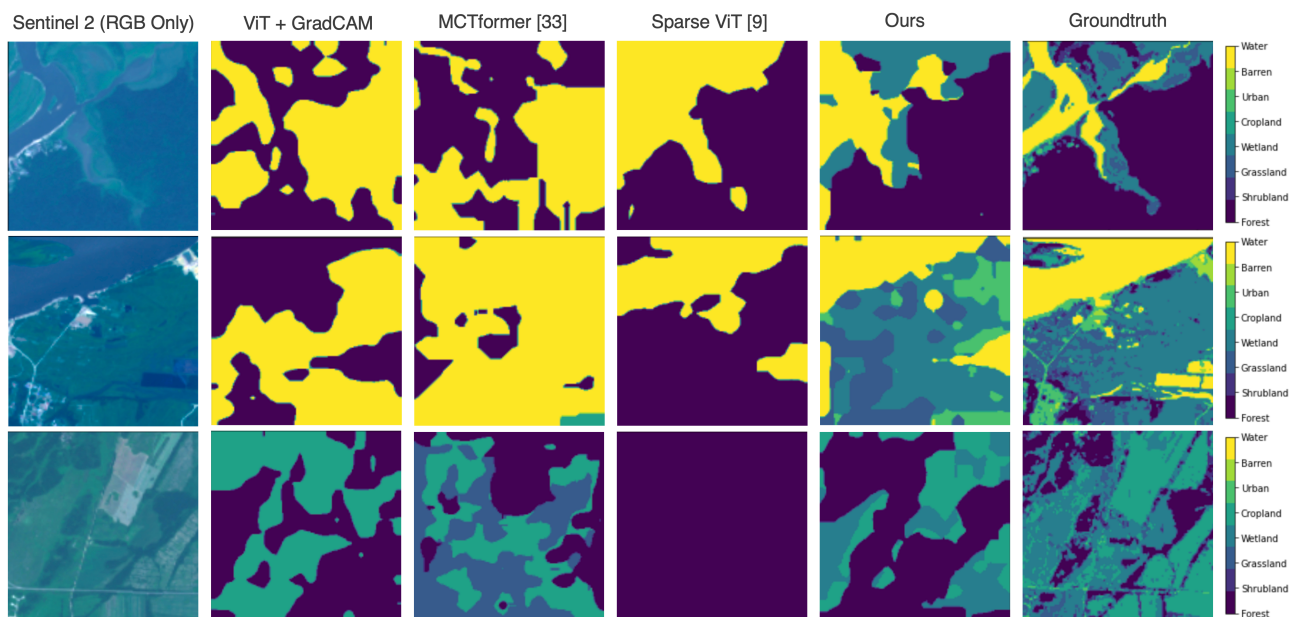

Figure 8. Qualitative comparison of our approach with other weakly supervised methods and the groundtruth, for the DFC2020 dataset.

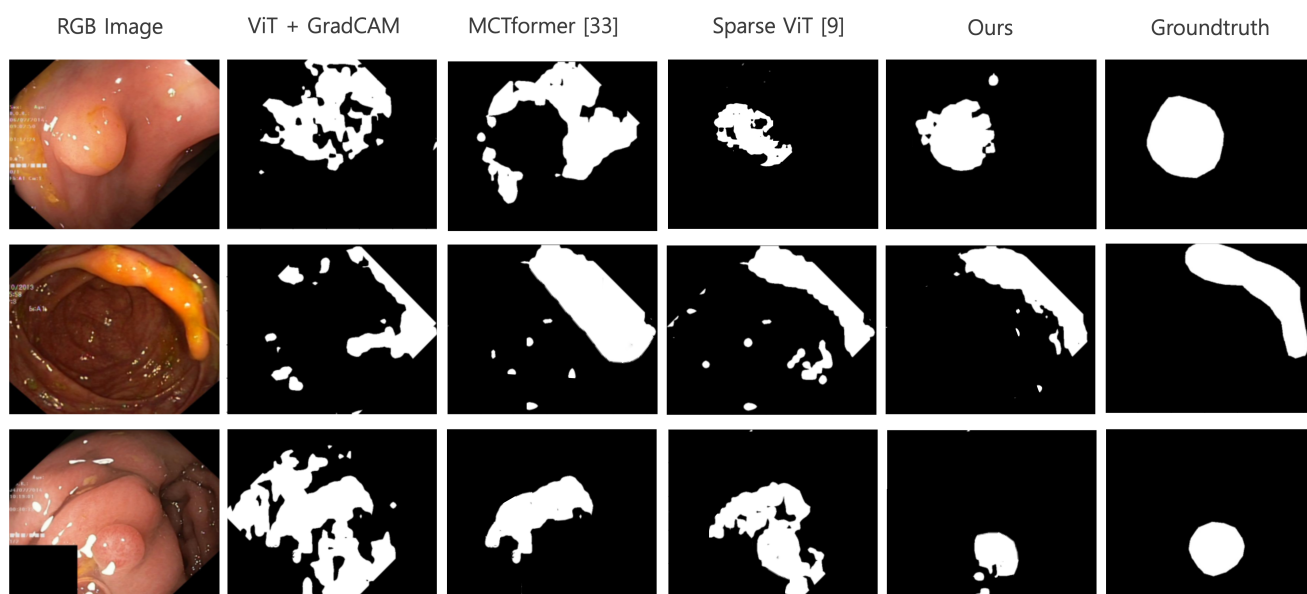

Figure 9. Qualitative comparison of our approach with other weakly supervised methods and the groundtruth, for the EndoTest dataset.
